# Supplementary material for: Hydrothermal synthesis, morphology control and tunable luminescence properties of AgTbW2O8:Eu3+ phosphors
Source: Royal Society of Chemistry journal article supplement (doi:10.1039/d3ce01156a), 2023-12-28
Supplement: d3ce01156a1.pdf [file d3ce01156a1.pdf]

## Supporting Information

### Hydrothermal synthesis, morphology control and tunable luminescence properties of $\text{AgTbW}_2\text{O}_8:\text{Eu}^{3+}$ phosphors

Huimin Du,<sup>a</sup> Jie Yang,<sup>a</sup> Xingzuo Liu,<sup>a</sup> Jun Yang<sup>\*a</sup> and Shanshan Hu<sup>\*a</sup>

<sup>a</sup>School of Chemistry and Chemical Engineering, Southwest University, No. 2 Tiansheng Road, Beibei District, Chongqing 400715, China.

E-mail: [jiang@swu.edu.cn](mailto:jiang@swu.edu.cn), [hushan3@swu.edu.cn](mailto:hushan3@swu.edu.cn).

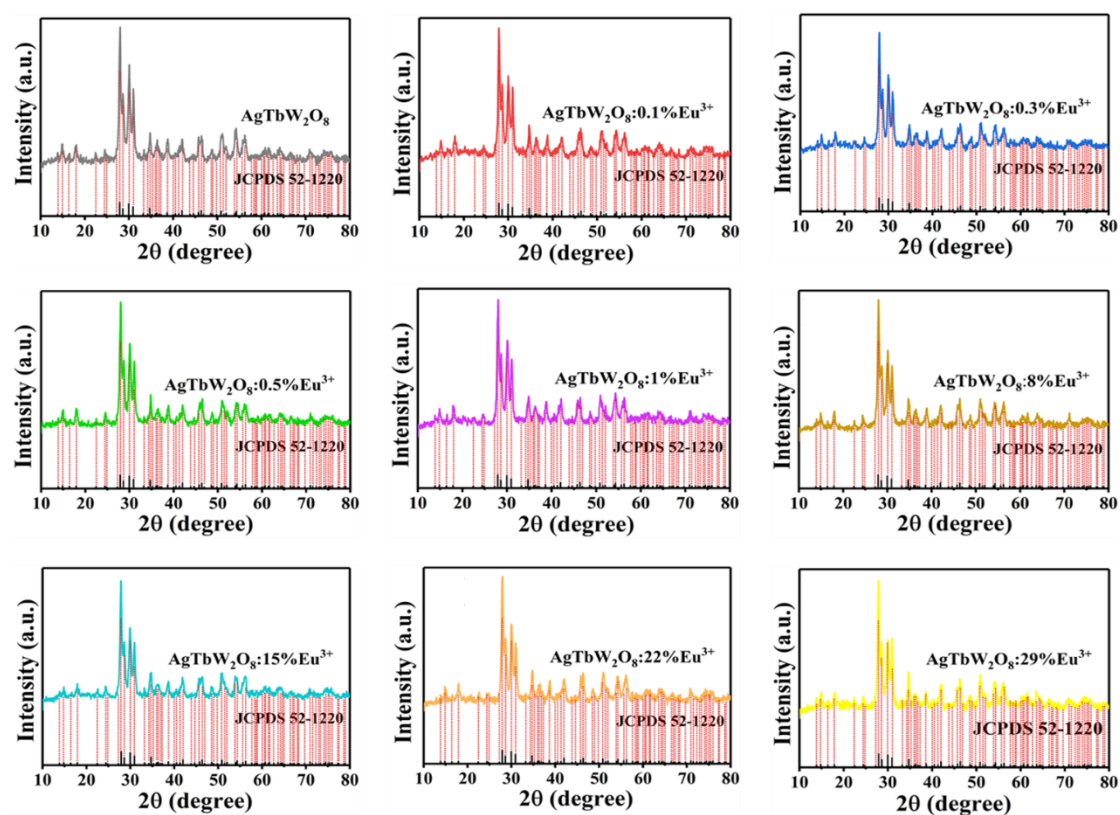

**Fig. S1** XRD patterns of  $\text{AgTbW}_2\text{O}_8$  and  $\text{AgTbW}_2\text{O}_8:x\%\text{Eu}^{3+}$  ( $x = 0.1, 0.3, 0.5, 1, 8, 15, 22, 29$ ).
